# Supplementary material for: Evaluating the Atibaia River Hydrology using JULES6.1
Source: Copernicus journal article supplement (doi:10.5194/gmd-2021-170), 2021-08-11
Supplement: Supplementary file [file gmd-2021-170-AC1-supplement.pdf]

## Review of 'Evaluating the Atibaia River Hydrology using JULES6.1'

This paper presents results of applying JULES v6.1 to the Atibaia river catchment in Brazil. The authors compare modelled river flow predictions with observed values, comparing the two saturation excess schemes available in the JULES code; PDM and TOPMODEL. The authors perform a sensitivity analysis of parameters within PDM and TOPMODEL and conclude that either option can be used to satisfactorily estimate river flow. The authors suggest that better rainfall drivers would improve the model results further. While this is likely true, I feel that consideration of other sources of error would also be appropriate – in particular the relatively coarse resolution of the JULES runs and the choice of river routing model. I also think the manuscript would benefit from some clarifications, particularly in the results and discussion section. Please see below for specific comments.

### Comments:

- Please make sure the citation style is consistent throughout.

Reference style checked, updated to APA 7<sup>th</sup>.

- Line 11 (and elsewhere) the phrase 'environmental processes changes' is a bit confusing – please could you rephrase this?

Rephrased wording to environmental changes

- Line 16. I disagree with the statement that 'Our results show that the coarse resolution of the rainfall data is the main reason to reduce model performance'

Reason for support in the discussion sections:

1. most of flows are well simulated, which means the model regime could simulated the flow although different routing scheme could also alter the model performance.
2. Some intense rainfall event in our stations did not affect the observed flow, which means the rainfall event might not occur in the whole basin.

- Line 34. I'm not clear what the relevance of the MCMC model is here – is this just another example of alternative modelling methods? Please clarify.

Yes. This is just another example of alternative modelling method. I found it not that relevant to the research. I remove this content to make it clear.

- Line 48. I would describe the driving data for JULES as 'meteorological', rather than 'hydrometeorological'.

Description changed.

- Line 56. Does the region really have both C3 and C4 grasses? And, later in the paper you mention that 12% of the catchment is urban. Can you comment on that here?

Yes. The classification is based on MODIS data reclassified by Houldcroft et. al (2009).

There are C3 and C4. I add the description of urban.

- Line 61. Please make sure you are clear in the distinction between precipitation and throughfall.

Description added.

- Line 64. Could you make it a bit clearer that you have compared results from using PDM and TOPMODEL?

Description added. We evaluated the sensitivity of hydrological parameters and calibrated the model to select the most suitable approach for the study region.

- Line 71. What is the spatial scale over which you have calculated the soil physics parameters from textures in the HWSD? IS it representative of the subcatchments you have used?

The spatial scale of HWSD is 0.0833 degree. The sub-basin is classified to two soil categories. We use the soil data from the highest percentage class "Ferric Acrisols". This soil type is one of the representative soils in this catchment according to survey data as listed in study region section (FAO/IIASA/ISRIC/ISSCAS/JRC, 2012; Ottoni et al., 2018; Rossi, 2017).

- Line 74 (or elsewhere) can you make it clear that you have run JULES with each subcatchment as an effective grid box? The more usual approach is to divide an area of interest into approximately square grid boxes. (I don't think there's any problem with doing it by subcatchment, but it needs to be clear!)

We have run JULES with 18 sub-basins. I have made the statement clear.

- Line 76. Can you make clearer how rainfall data are substituted in the case of missing data? And can you give the reader an idea of how representative the rainfall data are likely to be for each catchment?

We use the rainfall data from the nearest station of each gridbox. Monitoring station of Campinas-IAC (Campinas, Atibaia, and Nazare Paulista) has the most comprehensive record, except missing data in 2012 and 2015. We use the rainfall data from DAEE as a substitute in 2012 and 2015. The DAEE data is not the comprehensive (with missing data) in other years, that's the reason we use Campinas-IAC data as the major data source.

- Line 80. Can you justify using this simple river routing model rather than RFM or similar, as is more usual? Should the equation in this paragraph be labelled equation (1)? Also please make sure you define all the symbols in all equations in the paper – adding in units can also be really helpful to the reader. Should there be two different values of C for surface and subsurface flows? How was the value for this chosen?

For C values. Yes. There should be two different values. A lower C should be used for

subsurface flow. However, it has little affect on the results since the change of subsurface flow in JULES is far slower than the surface flow.

- Line 98. Can you make this clearer?

I rewrite this: The study region's rainfall presents a seasonal pattern with rainy summer and dry winter ...

- Line 108. Can you explain how you account for the effect of dams?

Description added. L48

The release data of the dams is used as the upstream flow, which is obtained from the Basic Sanitation Company of the State of Sao Paulo (SABESP, 2020).

- Lin 117. Why do you use a value of 0.085 here? I would suggest that equation (1) is not necessary.

Yes. I didn't find the reason to use 0.085 here. Several values are used for the UK basin, which still need to be investigated. I removed the part of BFI since it is not mention and compared in this research. I change the model evaluation indicator using the NSE, RMSE-observations standard deviation ratio (RSR) , and percent bias ( $P_{BIAS}$ ), following Moriasi et al. (2007).

- Line 120. Which quantity is this the standard deviation of? Please make sure all symbols used are clearly defined – also for the equations from line 125.

Daily flow

- Line 125. Please can you make clear to the reader what these metrics mean – i.e. what constitutes a 'good score' etc?

Content updated. I use indicator from Moriasi et al., 2007 to replace the original content.

- Line 134 (and elsewhere). Can you please make clearer what you mean by 'gradually alters the hydrograph'?

I removed this description due to the rewrite modelling results and discussions. However, I have added Figure 4 to show the change on hydrograph with using different parameters.

- Line 137. You state that the flow is changed to a subsurface flow-dominated regime, but is this shown in the results section?

I have added Figure 4 to show the change on hydrograph.

- Line 139. The choice of  $b_{pdm} = 0.5$  is also not demonstrated in the results shown.

Description added in L134:

We examined the model performance with a combination of soil depth, shape factor, and minimum soil water content, and found that the highest performance with combination  $dz=1.0$ ,  $b=0.5$ ,  $s=0$ , which altered the shape factor alone.

- Figure 3. Are these points mean flows? Daily/hourly data points? Please clarify. I would also suggest adding a 1:1 line and/or plotting these with a square aspect ratio to make the relationship clearer. The caption of 3.a is also a little tricky to read.

Mean daily flow. I have made a new square figure 3.

- Line 143. Is this conclusion shown in figure 3d as stated? Please make this clearer if so.
- Line 143. Please justify the statement that peak flow was reduced for a lower  $t_{i\_max}$ .  $t_{i\_max}$  is removed. We added the analysis of  $f_{exp}$  with is more relevant. (Martínez-de la Torre et al., 2019)

- Line 150. Please comment on the fact that although TOPMODEL scores better in terms of NSE and  $R^2$ , the bias is worse.

I have change the model evaluation indicator using the NSE, RMSE-observations standard deviation ratio (RSR) , and percent bias ( $P_{BIAS}$ ), following Moriasi et al. (2007). In case, TOPMODEL scores better in terms of NSE and RSR. (describe after L141)

- Line 155: Please reword this as the meaning is unclear

I removed this description due to the rewrite modelling results and discussions.

- Line 157 and throughout. Please be specific about which metric you are referring to by 'modelling performance' (e.g. NSE here)

I removed this description due to the rewrite modelling results and discussions.

- Line 160. You state that uncertainty in rainfall data **could** be the main driver for the gap. I agree that it could be, but could you comment on other sources of error and/or uncertainty?

Most of flows are well simulated, which means the model regime could simulated the flow although different routing scheme could also alter the model performance.

- Line 161. What do you mean by 'complimentary' here?

Description added. Replacing the missing data (also added in section 2.1)

- Line 162. Can you rephrase this sentence? Not sure what is meant by 'variated' or 'significant modelling period'.

I have rephrased.

Variated data -> the highly variation of rainfall data

significant modelling period -> most of modelling period

- Line 164 – 167. Can you make sure all of these statements are reflected in the results data shown?

I removed the lines due to the rewrite modelling results and discussions. But I have checked the statements are reflected in the new results data shown.

- Line 169. You compare to SWAT results here; can you show some results or otherwise justify this assertion?

L167. I added the NSE value from the SWAT research.

- **Small things:**

Line 15. Suggest changing 'to evaluate' to 'of evaluating'

Line 49. Suggest changing 'which' to 'and'

Line 54. 'detailly' is not a word, please replace

Line 61. Not sure 'presented' is the right word here – could you reword this?

Line 113. Suggest changing 'modelling' to 'modelled'

Line 130. Suggest replacing 'using' with 'in'.

Relevant changes are made.

- Suggest including a reference to <https://doi.org/10.5194/gmd-12-765-2019>, in which JULES + PDM and JULES + TOPMODEL are calibrated for some river catchments in the UK.

The relevant paper is now cited for comparison in sensitivity analysis and results section.
